# Supplementary material for: The H1047R point mutation in p110 alpha changes the morphology of human colon HCT116 cancer cells
Source: PubMed Central journal article supplement (PMC4979441; doi:10.1038/cddiscovery.2015.44), 2015-10-19
Supplement: cddiscovery201544-s1.pdf [file cddiscovery201544-s1.pdf]

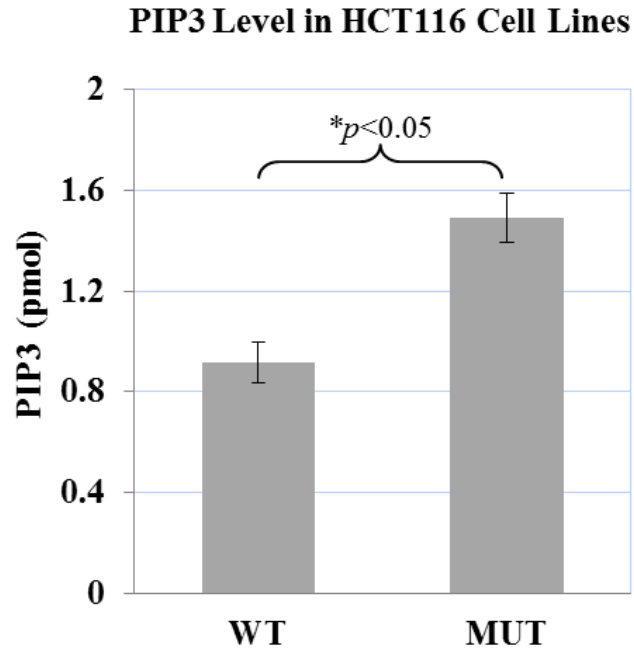

Supplemental Figure 1 **The H1047R mutation in the p110 $\alpha$  kinase domain of PI3K increases the levels of cellular PIP<sub>3</sub>.** Lipids were extracted from HCT116 WT and MUT cells ( $2.5 \times 10^7$  cells of each), and the levels of PIP<sub>3</sub> were measured using a PIP<sub>3</sub> Mass ELISA Kit. The level of PIP<sub>3</sub> was significantly higher in MUT cells than that in WT cells (two-tail student *t*-test,  $p < 0.05$ ).

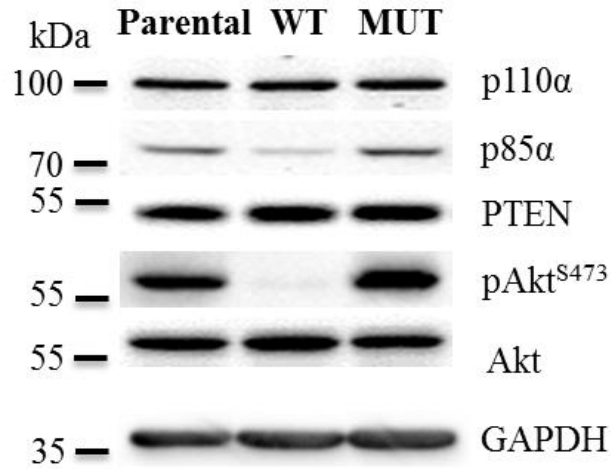

Supplemental Figure 2 **The H1047R mutation in the p110 $\alpha$  kinase domain of PI3K increases phosphorylation of Akt.** p110 $\alpha$ , p85 $\alpha$ , PTEN and Akt levels in HCT116 cell lines were compared by Immuno-blotting analysis. HCT116 MUT cells show higher phosphorylated Akt levels compared to WT cells.
