# Supplementary material for: The H1047R point mutation in p110 alpha changes the morphology of human colon HCT116 cancer cells
Source: PubMed Central journal article supplement (PMC4979441; doi:10.1038/cddiscovery.2015.44), 2015-10-19
Supplement: cddiscovery201544-s2.pdf [file cddiscovery201544-s2.pdf]

**Supplemental Movies** Movement of live HCT116 WT and MUT cells. HCT116 WT (Movie-1) and MUT (Movie-2) Cells, transfected with Lifeact-GFP, were cultured in a chamber slide for 24 hours, and transmission and fluorescence time-laps images were acquired over 10 minutes (40 × magnification).
